# Supplementary material for: Attentional Modulation of Brain Responses to Primary Appetitive and Aversive Stimuli
Source: PubMed Central journal article supplement (PMC4497686; doi:10.1371/journal.pone.0130880), 2015-07-09
Supplement: pone.0130880.s001.pdf [file pone.0130880.s001.pdf]

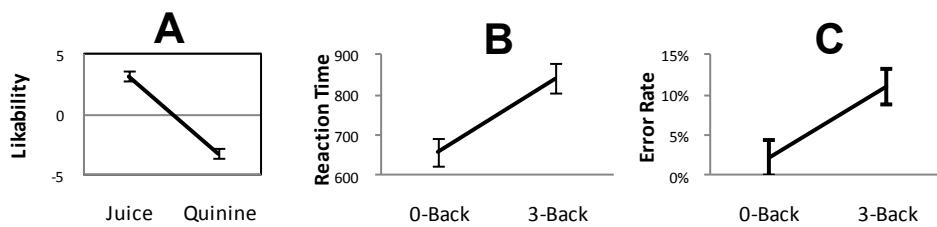

**S1 Fig. Behavioral data.** A, Mean Likert rating of how much participants liked the juice and quinine HCl. B, Mean reaction times for the 0-back and 3-back conditions. C, Mean error rate for the 0-back and 3-back conditions. Error bars show s.e.m.
