# Supplementary material for: Attentional Modulation of Brain Responses to Primary Appetitive and Aversive Stimuli
Source: PubMed Central journal article supplement (PMC4497686; doi:10.1371/journal.pone.0130880), 2015-07-09
Supplement: pone.0130880.s002.pdf [file pone.0130880.s002.pdf]

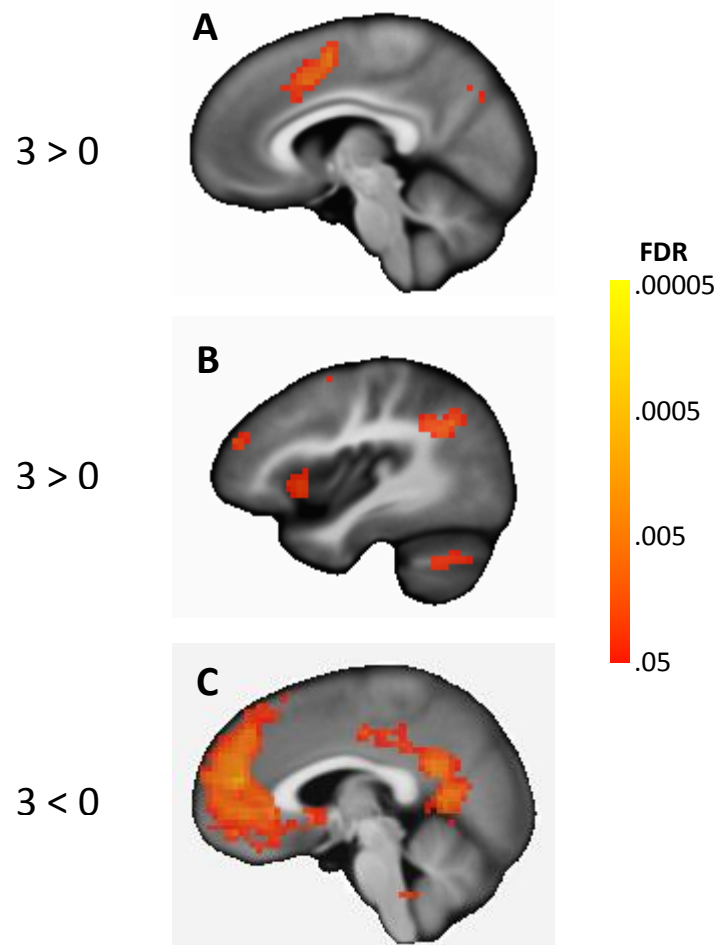

**S2 Fig.** This illustrates how the BOLD level in the 3-back block differed from the 0-back block. The methods and corresponding results were consistent with previous reports on the  $n$ -back task. **A** and **B**: Sagittal slices ( $x = 6$  and  $x = -38$ ) reveal regions which had larger BOLD in the 3- versus the 0-back condition, including (**A**) the dorsal anterior cingulate region and (**B**) the dorsal lateral prefrontal cortex (BA 36 and BA 9), anterior insula, and parietal cortex around BA 40. **C** ( $x = 3$ ) shows the opposite (areas in which BOLD is lower in the 3- versus the 0-back conditions). This included large regions in the ventromedial prefrontal cortex and posterior cingulate. We used a significance threshold of  $q = 0.05$ , 10 contiguous nearest neighbor voxels. Color represents significance as indexed by false discovery rate (see logarithmic color bar).
