# Supplementary material for: Attentional Modulation of Brain Responses to Primary Appetitive and Aversive Stimuli
Source: PubMed Central journal article supplement (PMC4497686; doi:10.1371/journal.pone.0130880), 2015-07-09
Supplement: pone.0130880.s004.pdf [file pone.0130880.s004.pdf]

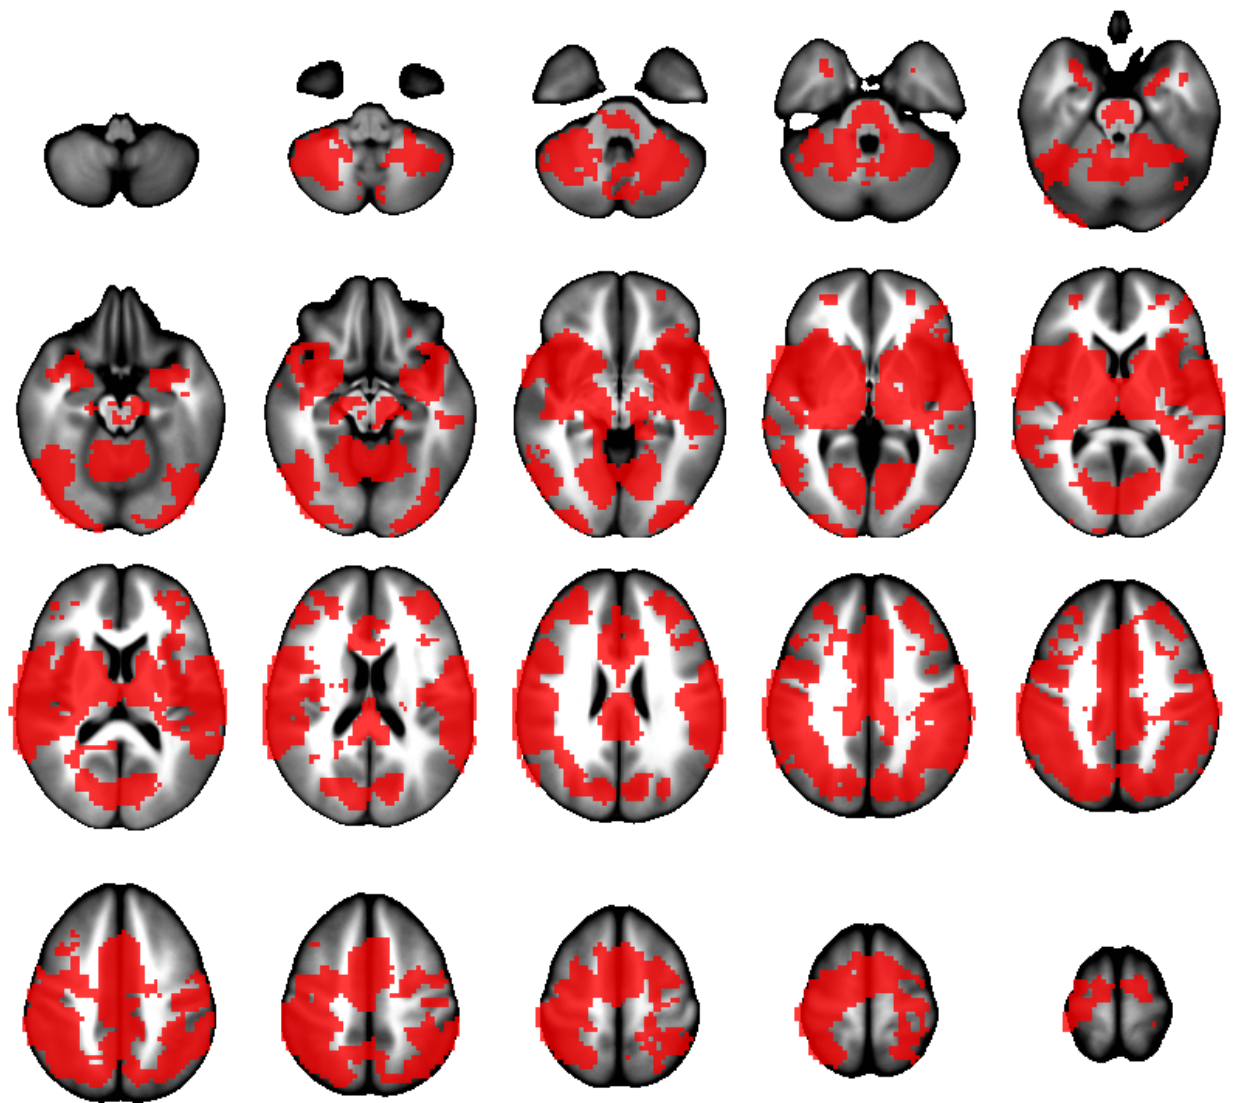

**S4 Fig.** Areas that were significant in the main effect of stimulus (probe, juice, quinine and flickering checkerboard). Each red voxel represents that all 16 of the leave-one-participant-out folds were significant (i.e., the intersection of each fold). For illustration purposes, only clusters of at least ten nearest neighbors are included. (Left = left).
