# Supplementary material for: Attentional Modulation of Brain Responses to Primary Appetitive and Aversive Stimuli
Source: PubMed Central journal article supplement (PMC4497686; doi:10.1371/journal.pone.0130880), 2015-07-09
Supplement: pone.0130880.s007.pdf [file pone.0130880.s007.pdf]

| Entry | Prob. | Trial Time   |              |              |
|-------|-------|--------------|--------------|--------------|
|       |       | 6 seconds    | 8 seconds    | 10 seconds   |
| 1     | 0.083 | Juice        |              |              |
| 2     | 0.083 |              | Juice        |              |
| 3     | 0.083 |              |              | Juice        |
| 4     | 0.042 | Juice        |              | Checkerboard |
| 5     | 0.042 |              | Juice        | Checkerboard |
| 6     | 0.042 | Juice        | Checkerboard |              |
| 7     | 0.042 |              | Checkerboard | Juice        |
| 8     | 0.042 | Checkerboard | Juice        |              |
| 9     | 0.042 | Checkerboard |              | Juice        |
| 10    | 0.083 | Quinine      |              |              |
| 11    | 0.083 |              | Quinine      |              |
| 12    | 0.083 |              |              | Quinine      |
| 13    | 0.042 | Quinine      |              | Checkerboard |
| 14    | 0.042 |              | Quinine      | Checkerboard |
| 15    | 0.042 | Quinine      | Checkerboard |              |
| 16    | 0.042 |              | Checkerboard | Quinine      |
| 17    | 0.042 | Checkerboard | Quinine      |              |
| 18    | 0.042 | Checkerboard |              | Quinine      |

$\Sigma=1.00$

**S1 Table. All the possible trial types, and their probabilities, with respect to the timing of juice, quinine, and flickering checkerboard administration.** This shows every way that juice, quinine, and checkerboard can combine within a trial within the constraints that 1) juice and quinine are not delivered on the same trial and 2) no two events will occur at the same time. Probabilities were set such that these three event types occurred on half of all trials. Thus, each occurred with equal frequency (1 out of every 6 trials) at each of the three event time points.
