# Supplementary material for: Attentional Modulation of Brain Responses to Primary Appetitive and Aversive Stimuli
Source: PubMed Central journal article supplement (PMC4497686; doi:10.1371/journal.pone.0130880), 2015-07-09
Supplement: pone.0130880.s008.pdf [file pone.0130880.s008.pdf]

### **S1 Text. Details of analysis on task performance.**

For the first eleven subjects, responses were recorded only for the first 1.25 s post stimulus onset. However, we suspected that subjects were occasionally taking longer than 1.25 s to respond in the high-load task. To assure that subjects were maintaining high response accuracy, we extended the response recording period to 3.0 s for the remaining 6 subjects. This modification had no impact on subjects' performance. Subjects were slower on the 3-back task. Subjects who had the short response window:  $F(1,1046) = 31.46, p=1.92e-04$ ; long response window:  $F(1,688)=30.51, p=1.73e-02$ ; and all subjects combined:  $F(1,1734) = 15.21, p=1.00e-04$ . Similarly, subjects made more error in the 3-back task. Subjects who had the short response window:  $F(1,1298) = 34.87, 1.50e-04$ ; long response window:  $F(1,708) = 4.41, p=3.60e-02$ ; and all subjects combined:  $F(1,2039)=28.45,p=7.00e-05$ .
