# Supplementary material for: Attentional Modulation of Brain Responses to Primary Appetitive and Aversive Stimuli
Source: PubMed Central journal article supplement (PMC4497686; doi:10.1371/journal.pone.0130880), 2015-07-09
Supplement: pone.0130880.s009.pdf [file pone.0130880.s009.pdf]

Exit Questionnaire

Subject Number: \_\_\_\_\_

Please rate your response to the following questions by placing a checkmark in the appropriate box.

|                                         | Not at all |    |    |    |    | Very Much |    |    |    |    |    |
|-----------------------------------------|------------|----|----|----|----|-----------|----|----|----|----|----|
| How thirsty were you when you arrived?  | -5         | -4 | -3 | -2 | -1 | 0         | +1 | +2 | +3 | +4 | +5 |
| How thirsty are you now?                | -5         | -4 | -3 | -2 | -1 | 0         | +1 | +2 | +3 | +4 | +5 |
| How much did you enjoy the juice?       | -5         | -4 | -3 | -2 | -1 | 0         | +1 | +2 | +3 | +4 | +5 |
| How much did you enjoy the tonic water? | -5         | -4 | -3 | -2 | -1 | 0         | +1 | +2 | +3 | +4 | +5 |

**Text S2. The exit questionnaire that all participants filled out.**
